# Supplementary material for: The Psychology of Morality: A Review and Analysis of Empirical Studies Published From 1940 Through 2017
Source: PubMed Central journal article supplement — Pers Soc Psychol Rev. 2019 Jan 18;23(4):332–66. doi: 10.1177/1088868318811759 (PMC6791030; doi:10.1177/1088868318811759), 2019-01-18
Supplement: APPENDIX_1._Exclusion_of_papers_in_review.pdf [file APPENDIX_1._Exclusion_of_papers_in_review.pdf]

## APPENDIX 1

### EXCLUSION OF PAPERS IN REVIEW

*Number of papers excluded for being irrelevant or unempirical.*

| <b>Wave</b>                                        | <b>Collected in</b> | <b>Focal years</b> | <b>Found</b> | <b>Irrelevant excluded</b> | <b>Non-empirical excluded</b> | <b>Retained</b> |
|----------------------------------------------------|---------------------|--------------------|--------------|----------------------------|-------------------------------|-----------------|
| 1                                                  | 2014                | 2000-2013          | 997          | 551                        | 27                            | 419             |
| 2                                                  | 2016-2017           | 2014-2015          | 337          | 83                         | 33                            | 222             |
| 3                                                  | 2018                | 2016-2017          | 350          | 61                         | 24                            | 265             |
| 3                                                  | 2018                | 1995-1999          | 191          | 42                         | 44                            | 105             |
| TOTAL MAIN SET                                     |                     |                    | 1875         | 737                        | 128                           | 1010            |
| <b>Older publications (WoS records incomplete)</b> |                     |                    |              |                            |                               |                 |
| 3                                                  | 2018                | 1940-1994          | 381          | 46                         | 66                            | 267             |
| GRAND TOTAL                                        |                     |                    | 2256         | 783                        | 194                           | 1277            |
