# Supplementary material for: The Psychology of Morality: A Review and Analysis of Empirical Studies Published From 1940 Through 2017
Source: PubMed Central journal article supplement — Pers Soc Psychol Rev. 2019 Jan 18;23(4):332–66. doi: 10.1177/1088868318811759 (PMC6791030; doi:10.1177/1088868318811759), 2019-01-18
Supplement: APPENDIX_3._Bibliometric_indicators_used.pdf [file APPENDIX_3._Bibliometric_indicators_used.pdf]

### APPENDIX 3

#### BIBLIOMETRIC INDICATORS AND ANALYSIS

Table 1

*Bibliometric Indicators Used*

| Abbreviation   | Definition                                                                                                                                                            |
|----------------|-----------------------------------------------------------------------------------------------------------------------------------------------------------------------|
| p              | Total number of publications of a unit                                                                                                                                |
| tcs            | Total number of citations                                                                                                                                             |
| mcs            | Average number of citations of the publications of a unit (self-citations not included)                                                                               |
| mnjs           | Average normalized number of citations of the publications of a unit (self-citations not included)                                                                    |
| pp_top_perc    | Proportion of papers that belong to the top 10% of publications in fields included                                                                                    |
| pp_uncited     | Proportion of papers uncited                                                                                                                                          |
| prop_self_cits | Proportion of self-citations                                                                                                                                          |
| int_cov        | Internal coverage. Proxy of oeuvre being covered by Web of Science.<br>Measured by the proportion of cited references in the oeuvre linked to (other) CI publications |
| pp_collab      | Proportion of output resulting from scientific cooperation                                                                                                            |
| pp_int_collab  | Proportion of output resulting from international scientific cooperation                                                                                              |

Table 2

*Overview Results Bibliometric Analysis*

| Year        | p   | tcs   | mcs   | mncs | mnjs | pp_top_perc | pp_uncited | prop_self_cits | int_cov | pp_collab | pp_int_collab |
|-------------|-----|-------|-------|------|------|-------------|------------|----------------|---------|-----------|---------------|
| 1995 - 2016 | 870 | 17865 | 20,53 | 1,35 | 1,13 | 16%         | 11%        | 12%            | 67%     | 54%       | 27%           |
| 1995- 1998  | 78  | 178   | 2,28  | 0,95 | 0,9  | 9%          | 47%        | 38%            | 49%     | 29%       | 9%            |
| 1996- 1999  | 80  | 130   | 1,63  | 0,72 | 0,94 | 5%          | 45%        | 38%            | 53%     | 33%       | 13%           |
| 1997- 2000  | 79  | 155   | 1,96  | 0,78 | 1,05 | 5%          | 39%        | 35%            | 54%     | 34%       | 10%           |
| 1998- 2001  | 75  | 152   | 2,03  | 0,76 | 1,03 | 6%          | 40%        | 29%            | 54%     | 35%       | 9%            |
| 1999- 2002  | 73  | 187   | 2,56  | 0,83 | 1,13 | 10%         | 36%        | 28%            | 58%     | 38%       | 11%           |
| 2000- 2003  | 65  | 173   | 2,66  | 0,94 | 1,19 | 10%         | 32%        | 26%            | 58%     | 43%       | 9%            |
| 2001- 2004  | 56  | 181   | 3,23  | 1,01 | 1,25 | 13%         | 25%        | 30%            | 57%     | 50%       | 16%           |
| 2002- 2005  | 47  | 207   | 4,4   | 1,02 | 1,23 | 12%         | 23%        | 26%            | 58%     | 51%       | 19%           |
| 2003- 2006  | 46  | 140   | 3,04  | 0,85 | 1,1  | 5%          | 33%        | 30%            | 55%     | 48%       | 15%           |
| 2004- 2007  | 53  | 138   | 2,6   | 1,03 | 1,08 | 9%          | 23%        | 31%            | 53%     | 57%       | 21%           |
| 2005- 2008  | 75  | 197   | 2,63  | 1,06 | 1,02 | 10%         | 29%        | 29%            | 57%     | 49%       | 16%           |
| 2006- 2009  | 111 | 386   | 3,48  | 1,22 | 1,09 | 11%         | 32%        | 26%            | 60%     | 50%       | 16%           |
| 2007- 2010  | 133 | 597   | 4,49  | 1,38 | 1,06 | 15%         | 26%        | 24%            | 63%     | 53%       | 23%           |
| 2008- 2011  | 155 | 902   | 5,82  | 1,58 | 1,1  | 20%         | 24%        | 21%            | 65%     | 50%       | 25%           |
| 2009- 2012  | 191 | 1345  | 7,04  | 1,79 | 1,13 | 23%         | 22%        | 20%            | 67%     | 56%       | 27%           |
| 2010- 2013  | 223 | 1343  | 6,02  | 1,61 | 1,16 | 20%         | 20%        | 21%            | 69%     | 58%       | 30%           |
| 2011- 2014  | 302 | 1827  | 6,05  | 1,59 | 1,22 | 20%         | 19%        | 20%            | 70%     | 59%       | 32%           |
| 2012- 2015  | 354 | 1836  | 5,19  | 1,3  | 1,18 | 16%         | 18%        | 21%            | 71%     | 61%       | 34%           |
| 2013- 2016  | 430 | 1903  | 4,43  | 1,16 | 1,12 | 13%         | 21%        | 23%            | 72%     | 62%       | 35%           |
