# Supplementary material for: The Psychology of Morality: A Review and Analysis of Empirical Studies Published From 1940 Through 2017
Source: PubMed Central journal article supplement — Pers Soc Psychol Rev. 2019 Jan 18;23(4):332–66. doi: 10.1177/1088868318811759 (PMC6791030; doi:10.1177/1088868318811759), 2019-01-18
Supplement: Supplementary_Figures.pdf [file Supplementary_Figures.pdf]

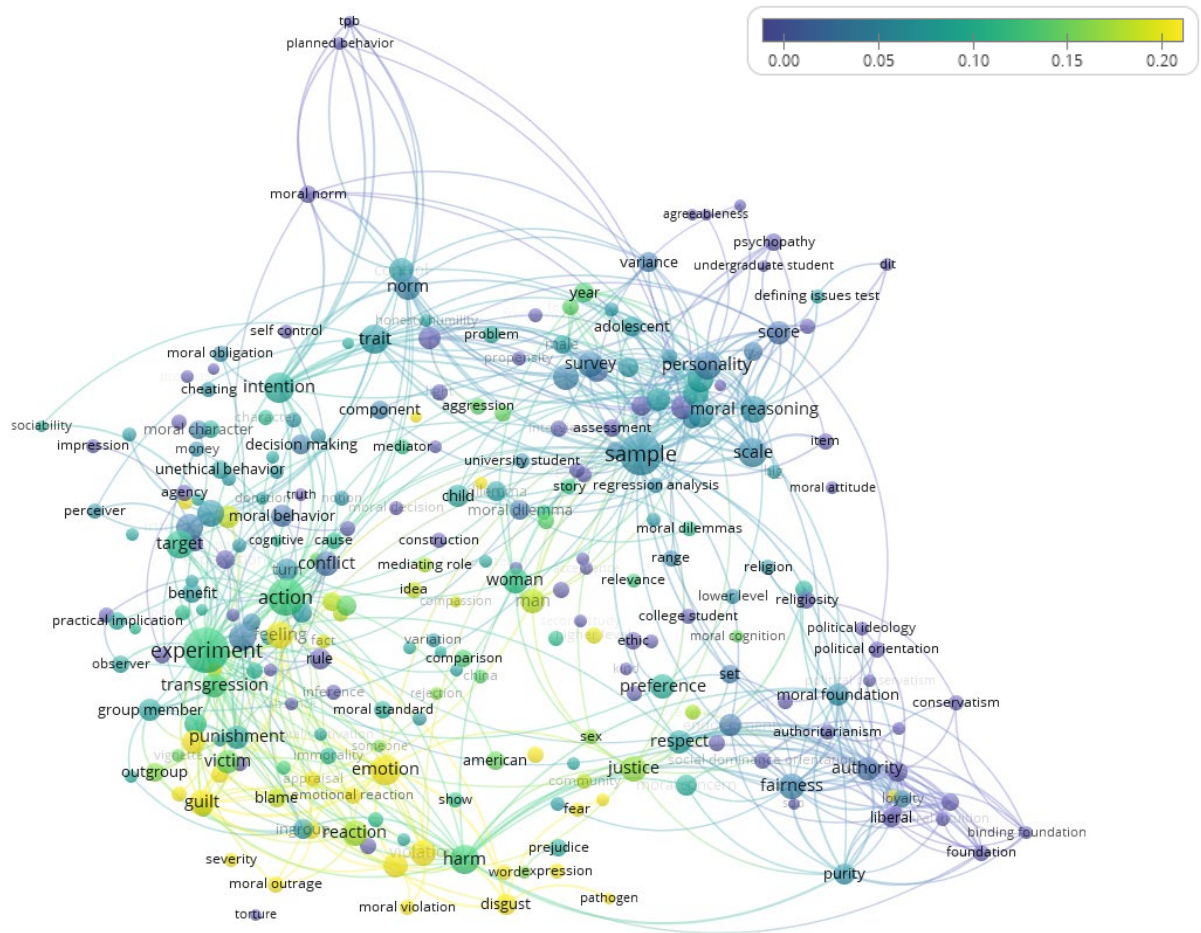

Figure D. Publications on Moral Emotions, 1996-2017. Relative frequency of observed clusters and relations.
