# Supplementary material for: The Psychology of Morality: A Review and Analysis of Empirical Studies Published From 1940 Through 2017
Source: PubMed Central journal article supplement — Pers Soc Psychol Rev. 2019 Jan 18;23(4):332–66. doi: 10.1177/1088868318811759 (PMC6791030; doi:10.1177/1088868318811759), 2019-01-18
Supplement: Supplementary_Tables.pdf [file Supplementary_Tables.pdf]

Table A

*Experimental manipulations of morality used in studies published from 2010 through 2013*

|                        | <b>Moral Reasoning</b>                                                                     | <b>Moral Judgments</b>                                                                                                                                                                                                                 | <b>Moral Behavior</b>                                                                         | <b>Moral Emotions</b>        | <b>Moral Self-views</b> | <b>TOTAL<br/>N = 419 studies</b> |
|------------------------|--------------------------------------------------------------------------------------------|----------------------------------------------------------------------------------------------------------------------------------------------------------------------------------------------------------------------------------------|-----------------------------------------------------------------------------------------------|------------------------------|-------------------------|----------------------------------|
| Situational prime      | (Non-)Verbal prime (clean-dirty), goal frame (promotion-prevention); N = 28                | Deliberation-intuition, action-person, how-why, concrete-abstract, mood induction, odor, color, music; N = 14<br>Stimulus presentation, response format; N = 4                                                                         | Reminder of fairness rule, honor code, commandments; N = 11<br>Self-threat-affirmation; N = 4 | Experimental emotion; N = 21 | Behavioral prime; N = 9 | N = 91 studies<br>22%            |
| Target characteristics | Self-other, human-animal, ingroup-outgroup, close-distant, individual-organization; N = 11 | 1 <sup>st</sup> -3 <sup>rd</sup> person, near-distant in time, recorded-observed; N = 6<br>National, religious, cultural, sexual identity, individual-group; N = 15<br>Innocence-guilt, agency-communion, morality-sociability; N = 12 | Self-other, near-distant in future; N = 7                                                     | --                           | --                      | N = 51 studies<br>12%            |

|                         |                                                                  |                                                                                                                                 |                                                                                                              |                            |                                                                             |                        |
|-------------------------|------------------------------------------------------------------|---------------------------------------------------------------------------------------------------------------------------------|--------------------------------------------------------------------------------------------------------------|----------------------------|-----------------------------------------------------------------------------|------------------------|
| Type of moral situation | Deliberate-accidental, material-moral, intent-consequence; N = 4 | Duty-ideal, harm-no harm, justice-care, dating-working; N = 10 Selfish-generous, intentional-automatic, provoke-befriend; N = 6 | Care-justice, clean-safe, ideal-obligation, courage-helping; N = 6                                           | Actual experiences; N = 25 | --                                                                          | N = 51 studies<br>12%  |
| Social Norm             | Consensus, controversy, what others think/do; N = 6              | --                                                                                                                              | How others evaluate behavior, sanctions imposed; N = 5<br>Behavior of others; N = 4<br>Public-private; N = 4 | --                         | Moral threat, moral superiority of others; N = 9<br>Moral group norm; N = 3 | N = 31 studies<br>7%   |
| Participant Identity    | Religiosity, nationality, culture; N = 4                         | --                                                                                                                              | --                                                                                                           | --                         | --                                                                          | N = 4 studies<br>< 1%  |
| Cognitive Ability       | Distraction task, immediate-delayed, depletion; N = 6            | --                                                                                                                              | --                                                                                                           | --                         | --                                                                          | N = 6 studies<br>1%    |
| None (correlational)    | N = 90                                                           | Different traits of same target; N = 18                                                                                         | Self-reported intentions with personal norms, convictions, beliefs; N = 37                                   | --                         | N = 27                                                                      | N = 185 studies<br>44% |

---

Self-reported behavior  
with team norms,  
family rules, important  
others; N = 13

---

Table B

*Dependent measures of morality used in studies published from 2010 through 2013, with N indicating the number of times a measure was used. One publication can contain multiple dependent measures.*

|                                | <b>Moral Reasoning</b>                                                     | <b>Moral Judgments</b>                                                                     | <b>Moral Behavior</b>                                                        | <b>Moral Emotions</b> | <b>Moral Self-views</b>                                                          | <b>TOTAL<br/>N = 445 measures</b> |
|--------------------------------|----------------------------------------------------------------------------|--------------------------------------------------------------------------------------------|------------------------------------------------------------------------------|-----------------------|----------------------------------------------------------------------------------|-----------------------------------|
| Hypothetical Situation         | Dilemma choice, standard<br>measure; N = 24                                | --                                                                                         | Willingness to<br>cooperate, help,<br>volunteer; N = 11                      | --                    | Intention to lie, cheat,<br>help, donate; N = 13                                 | N = 44 measures<br>10%            |
| General Moral Principles       | Guiding motives, principles,<br>MFQ; N = 23<br>'Good' people; N = 16       | Moral exemplars, features<br>good person; N = 4                                            | --                                                                           | --                    | Big five, HEXACO,<br>moral identity; N = 20<br>Traits ascribed to self;<br>N = 9 | N = 72 measures<br>16%            |
| Position on Specific<br>Issues | Abortion, torture, suicide, gay<br>adoption; N = 17                        | Behavior is right, approved,<br>moral, respected ; N = 19                                  | Likelihood of<br>environmental<br>behavior, gossiping,<br>aggressing; N = 14 | --                    | Ideals, strivings; N = 6<br>Political convictions; N<br>= 5                      | N = 61 measures<br>14%            |
| Moral Evaluation               | Blameworthiness, inferred<br>motives; N = 16<br>Perceived integrity; N = 7 | Positive, honest, moral; N =<br>19<br>Group/company; N = 13<br>Guilty, responsible; N = 12 | --                                                                           | --                    | Moral responsibility; N<br>= 2                                                   | N = 72 measures<br>16%            |

|                     |                                                         |                                                        |                                                                                    |                                            |                                           |                        |
|---------------------|---------------------------------------------------------|--------------------------------------------------------|------------------------------------------------------------------------------------|--------------------------------------------|-------------------------------------------|------------------------|
| Moral Implications  | Moral compromise, wrongness; N = 14<br>Deviance; N = 10 | --                                                     | Moral courage, proselytizing, demonstrating; N = 17                                | --                                         | Moral justification, disengagement; N = 7 | N = 48 measures<br>11% |
| Emotional Response  | Positive-negative, emotion intensity; N = 8             | Empathy with victim; N = 8                             | --                                                                                 | Guilt, shame, disgust, anger, fear; N = 51 | --                                        | N = 67 measures<br>15% |
| Moral Inclusion     | Circle of care, who is entitled help; N = 8             | Target is close, likeable, familiar, attractive; N = 7 | --                                                                                 | --                                         | --                                        | N = 15 measures<br>3%  |
| Implicit Indicators | RT's, sentence construction, word completion; N = 6     | --                                                     | Word completion, face categorization; N = 6                                        | --                                         | IAT, RT's; N = 3                          | N = 51 measures<br>12% |
| Moral Behavior      | --                                                      | --                                                     | Cooperation, cheating in lab; N = 28<br>Real life helping, donating, lying; N = 23 | --                                         | --                                        |                        |

---
